# Supplementary material for: Machine learning-based forecasting of daily acute ischemic stroke admissions using weather data
Source: bioRxiv or medRxiv preprint supplement (doi:10.1101/2024.07.03.24309252), 2024-07-04
Supplement: Supplementary file [file media-1.pdf]

# Supplementary appendix

## Supplementary table

**Supplementary Table 1. Summary table of the different features that are utilized in the fitted statistical and machine learning models.**

| Type           | Feature [Unit]             | Variable conversion                 |
|----------------|----------------------------|-------------------------------------|
| Weather        | Pressure [hPa]             | Mean, min, max, and lagged 1-7 days |
|                | Vapour pressure [hPa]      | Mean, min, max, and lagged 1-7 days |
|                | Temperature [°C]           | Mean, min, max, and lagged 1-7 days |
|                | Dewpoint temperature [°C]  | Mean, min, max, and lagged 1-7 days |
|                | Perceived temperature [°C] | Mean, min, max                      |
|                | Humidity [%]               | Mean, min, max, and lagged 1-7 days |
|                | Humid temperature [°C]     | Mean, min, max, and lagged 1-7 days |
|                | Sunshine duration [h]      | Total and lagged 1-7 days           |
|                | Precipitation height [m]   | Mean, min, max, and lagged 1-7 days |
|                | Cloud cover                | Status signal                       |
|                | Wind speed [m/s]           | Mean, min, max, and lagged 1-7 days |
|                | Wind gust [m/s]            | Mean, min, max, and lagged 1-7 days |
|                | Wind direction [°]         | Mean and lagged 1-7 days            |
|                | Calendar                   | Year                                |
| Weekday status |                            | Weekday or weekend                  |
| Week number    |                            | Status with values 1-52             |
| Holiday status |                            | Yes/No                              |

min.: minimum; max.: maximum; lagged 1-7 days: lag-1 to lag-7

# Supplementary figures

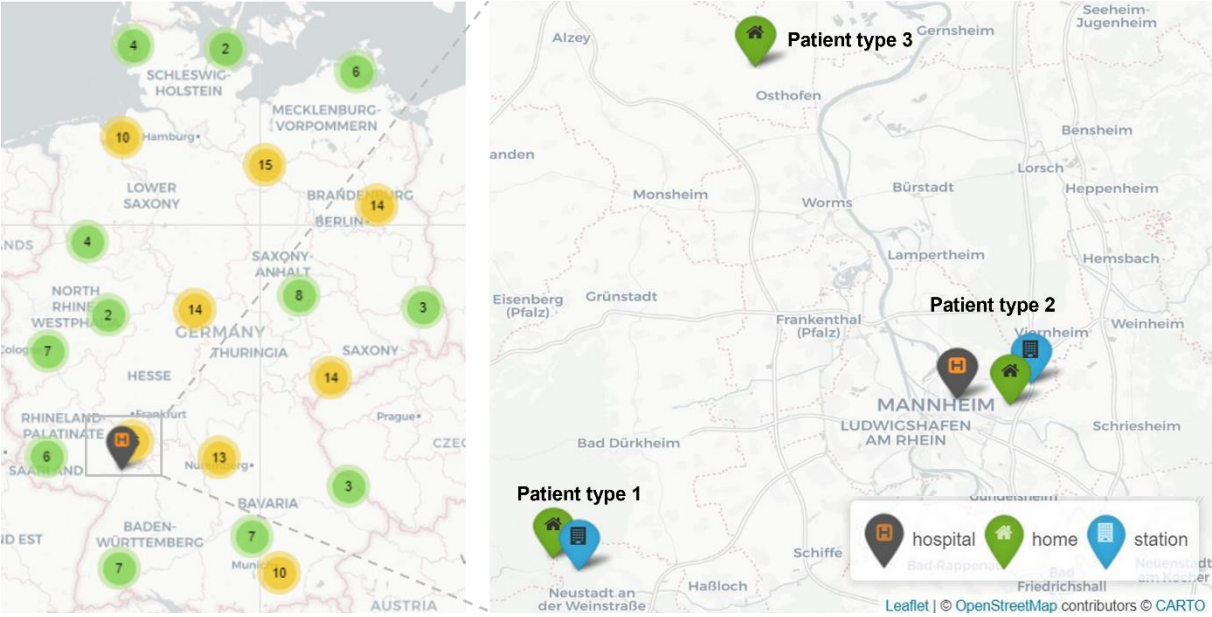

**Supplementary Figure S1. Distribution of German weather stations and patient types identified during geospatial matching.** Weather stations ( $n_{station}=135$ ) that had full coverage of data for the seven years (2015-2021) of all selected variables ( $n_{var}=133$ ) were chosen. When stations were close to each other, they were clustered together and shown as number of stations in that region in circles (number of towers  $<10$ : green;  $\geq 10$ : yellow). The location of University Medical Center (UMC) was indicated with the gray pinpoint with orange H. Three different patient types were identified during the complex geospatial matching: 1) type 1 patients had a different measurement station (blue pinpoint) mapped to their home locations (green pinpoint) than the closest station to the UMC; 2) For type 2 cases, the same station was mapped as closest to both home and UMC locations ( $<20$ km away); 3) type 3 patients also matched to the same station, but their distance was  $>20$  km to UMC and its reference station.

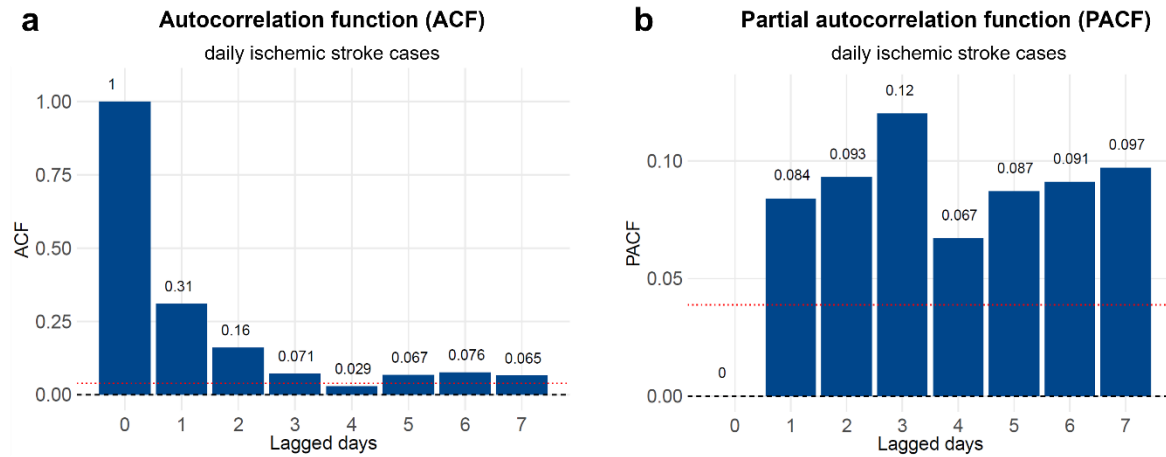

**Supplementary Figure S2. Autocorrelation- (ACF) and partial autocorrelation functions (PACF) plots of the daily ischemic stroke admissions.** The daily number of ischemic stroke admission were converted into time series, and the corresponding (a) ACF and (b) PACF with p values of the one- to seven-day lagged components were calculated and visualized as bar graphs. ACF p values were:  $p_{lag-1}=0.31$ ,  $p_{lag-2}=0.16$ ,  $p_{lag-3}=0.071$ ,  $p_{lag-4}=0.029$ ,  $p_{lag-5}=0.067$ ,  $p_{lag-6}=0.076$ , and  $p_{lag-7}=0.065$ . PACF p values were:  $p_{lag-1}=0.084$ ,  $p_{lag-2}=0.093$ ,  $p_{lag-3}=0.12$ ,  $p_{lag-4}=0.065$ ,  $p_{lag-5}=0.087$ ,  $p_{lag-6}=0.091$ , and  $p_{lag-7}=0.097$ . The ACF p value dropped considerably after lag-1, indicating that the influence of past number of admissions on current admissions quickly diminished after the one to two days. The PACF values did not have sharp cut-off and remained low, suggesting no strong autoregressive structure in the underlying data, making moving average or autoregressive components unnecessary for this analysis.<sup>1</sup> Consequently, shallow machine learning models were applied during downstream analyses.

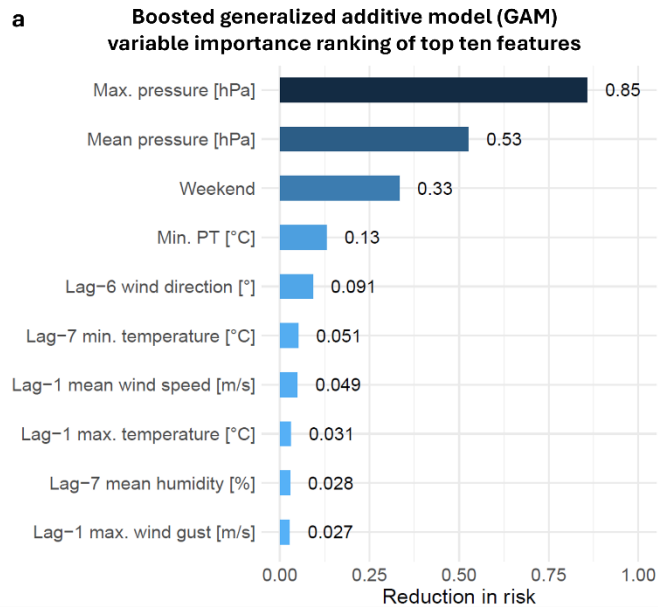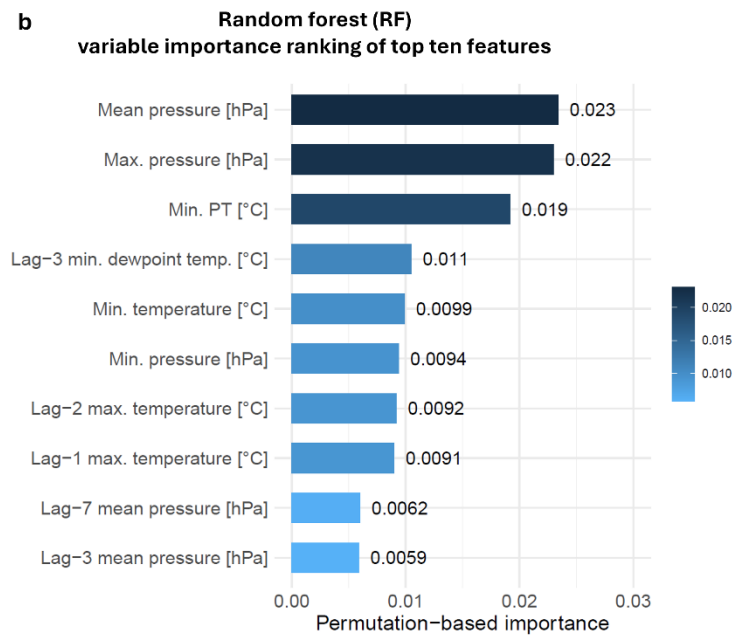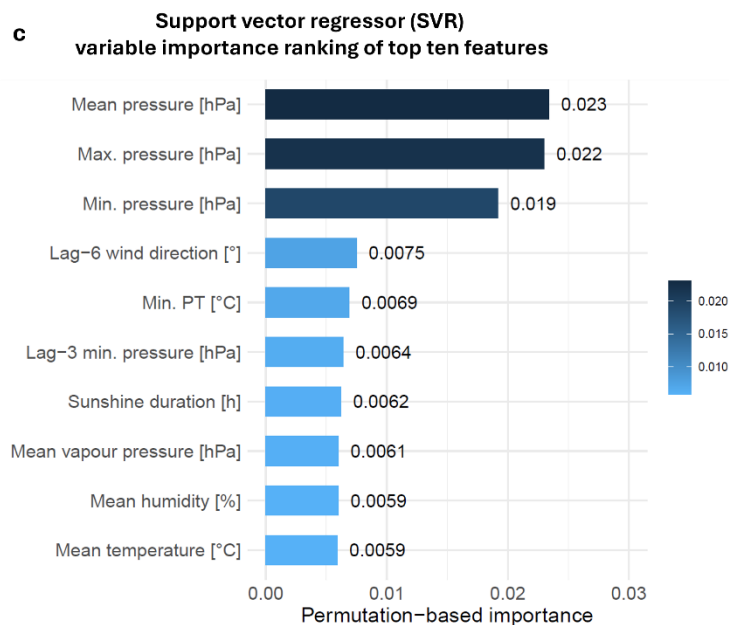

**Supplementary Figure S3. Variable importance of boosted generalized additive model (GAM), random forest (RF), and support vector regressor (SVR).** The bar plots indicate the top ten variables of the fitted **(a)** GAM, **(b)** RF, and **(c)** SVR models for daily acute ischemic stroke admissions, respectively. GAM identified maximum and mean pressure as the top two variables, while weekend status was selected as the third most important variable. GAM also included a combination of variables based on wind, temperature and humidity among the top ten variables. RF and SVR identified mean and maximum pressure as the two top variables. Similar to the extreme gradient boosting (XGB) model, RF also revealed minimum perceived temperature (PT) as the third most important variable. SVR selected minimum pressure as the third most important variable. Overall, RF mainly highlighted temperature and pressure-related features in the top ten. In contrast, SVR included a combination of variables based on wind, sunshine, humidity, and temperature, similar to GAM.

## References

1. Box GEP, Jenkins GM, Reinsel GC, et al. *Time series analysis: Forecasting and control*. Fifth edition. Hoboken, New Jersey: John Wiley & Sons, Inc, 2016.
